# Supplementary material for: Phenotypic and Genotypic Comparison of Antimicrobial-Resistant Variants of Escherichia coli and Salmonella Typhimurium Isolated from Evolution Assays with Antibiotics or Commercial Products Based on Essential Oils
Source: MDPI journal article supplement (doi:10.3390/ph16101443), 2023-10-11
Supplement: s1 [file s1]

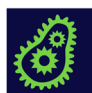

**Table S1:** Primers used for PCR amplification and Sanger sequencing to verify the mutations of evolved strains: EcAEN<sub>10</sub>, EcAEN<sub>20</sub>, EcCOLIFIT<sub>10</sub>, EcCOLIFIT<sub>20</sub>, EcAmox<sub>20</sub>, SeAmox<sub>10</sub>, SeAmox<sub>20</sub>, SeCol<sub>10</sub> and SeCol<sub>20</sub>.

| <b>EcAEN<sub>10</sub> mutations</b>                            | <b>Forward primer (5' → 3')</b> | <b>Reverse primer (5' → 3')</b> |
|----------------------------------------------------------------|---------------------------------|---------------------------------|
| <i>yqhC</i>                                                    | GTTGCTGTACCGGGAACGTA            | AGATGAGCATTTCAGCCGT             |
| <b>EcAEN<sub>20</sub> mutations</b>                            | <b>Forward primer (5' → 3')</b> | <b>Reverse primer (5' → 3')</b> |
| <i>cheW, cheA, motB, motA, motR, flhC, flhD</i>                | TTCTGTTGAAAGCGTCACGG            | CTGGCACTACGATCCGCATT            |
| <b>EcCOLIFIT<sub>10</sub> EcCOLIFIT<sub>20</sub> mutations</b> | <b>Forward primer (5' → 3')</b> | <b>Reverse primer (5' → 3')</b> |
| <i>yqhD</i>                                                    | TCGATCCGTGGCACATTCTG            | CTCCGGTGAGGTGTTGTGAA            |
| <i>cheA, motB, motA, motR, flhC, flhD</i>                      | TTCTGTTGAAAGCGTCACGG            | CTGGCACTACGATCCGCATT            |
| <b>EcAmox<sub>20</sub> mutations</b>                           | <b>Forward primer (5' → 3')</b> | <b>Reverse primer (5' → 3')</b> |
| DpiA binding site                                              | CTAATGTCAGCGCCAGTCCT            | TGGTAAAGGCGGATCGAGTG            |
| <b>SeAmox<sub>10</sub> SeAmox<sub>20</sub> mutations</b>       | <b>Forward primer (5' → 3')</b> | <b>Reverse primer (5' → 3')</b> |
| <i>nirC</i>                                                    | TATTTTGGGAGGCGCAACG             | CGTCGCTGTGATGACCAAAC            |
| <i>fepA</i>                                                    | TACGGCTGGTGACGGGTTTA            | GCGTTTCAGGACGATCCCAT            |
| <i>ftsI</i>                                                    | TTTGGGGTTGGTCGAGAAC             | CAGTAGTTGGGTGGTGGTGG            |
| <b>SeCol<sub>10</sub> mutations</b>                            | <b>Forward primer (5' → 3')</b> | <b>Reverse primer (5' → 3')</b> |
| <i>nirC</i>                                                    | TATTTTGGGAGGCGCAACG             | CGTCGCTGTGATGACCAAAC            |
| <i>fepA</i>                                                    | TACGGCTGGTGACGGGTTTA            | GCGTTTCAGGACGATCCCAT            |
| <i>basS</i>                                                    | TACGCAGTAACGTCGCATCA            | TGGACAGGAAGTACCCTGA             |
| <i>lipA</i>                                                    | CATGCCTTTGGCCTGGAGAT            | TGTGATGGAACGCGGTGTAA            |
| <b>SeCol<sub>20</sub> mutations</b>                            | <b>Forward primer (5' → 3')</b> | <b>Reverse primer (5' → 3')</b> |
| <i>nirC</i>                                                    | TATTTTGGGAGGCGCAACG             | CGTCGCTGTGATGACCAAAC            |
| <i>fepA</i>                                                    | TACGGCTGGTGACGGGTTTA            | GCGTTTCAGGACGATCCCAT            |
| <i>basS</i>                                                    | TACGCAGTAACGTCGCATCA            | TGGACAGGAAGTACCCTGA             |
| <i>yciM</i>                                                    | GCTTTGGCGTAATCCCCTCT            | AGAAGGCTGGATGCGGTAAG            |
